# Supplementary material for: Temporal and Microbiological Analysis of Cardiac Implantable Electrical Device Infections ― A Retrospective Study ―
Source: PubMed Central journal article supplement — Circ Rep. 2021 Aug 21;3(9):488–96. doi: 10.1253/circrep.CR-21-0095 (PMC8423618; doi:10.1253/circrep.cr-21-0095), 2021-08-21
Supplement: circrep-3-488-s001.pdf [file circrep-3-488-s001.pdf]

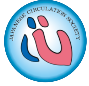

---

# **Temporal and Microbiological Analysis of Cardiac Implantable Electrical Device Infections**

— A Retrospective Study —

---

Yasuo Miyagi, MD, PhD; Shun-ichiro Sakamoto, MD, PhD; Yasuhiro Kawase, MD, PhD;  
Hiroya Oomori, MD; Yoshiyuki Watanabe, MD, PhD; Jiro Kurita, MD, PhD;  
Yuji Maruyama, MD, PhD; Takashi Sasaki, MD, PhD; Yosuke Ishii, MD, PhD

**Supplementary Table 1**

|                               | <b>Non-PR infection</b><br>N = 12 / total 13 pathogens<br>N (%) | <b>PR infection</b><br>N = 85 / total 110 pathogens<br>N (%) | <b>P value</b><br>(Bonferroni<br>correction) |
|-------------------------------|-----------------------------------------------------------------|--------------------------------------------------------------|----------------------------------------------|
| <b>Staphylococcal species</b> | <b>9 (69.2%)</b>                                                | <b>71 (64.5%)</b>                                            | <b>2.95</b>                                  |
| <i>S. aureus</i>              | 4 (30.8%)                                                       | 27 (24.5%)                                                   | 2.50                                         |
| CoNS                          | 5 (38.4%)                                                       | 44 (40.0%)                                                   | 3.656                                        |
| <b>Non-SPs</b>                | <b>1 (7.7%)</b>                                                 | <b>24 (21.8%)</b>                                            | <b>0.93</b>                                  |
| <b>Negative</b>               | <b>3 (23.1%)</b>                                                | <b>15 (13.7%)</b>                                            | <b>1.45</b>                                  |

**Supplementary Table 2**

|                               | <b>Non-PR systemic infection</b><br>N = 12 / total 13 pathogens<br>N (%) | <b>PR systemic infection</b><br>N = 14 / total 18 pathogens<br>N (%) | <b>P value</b><br>(Bonferroni<br>correction) |
|-------------------------------|--------------------------------------------------------------------------|----------------------------------------------------------------------|----------------------------------------------|
| <b>Staphylococcal species</b> | <b>9 (69.2%)</b>                                                         | <b>15 (83.3%)</b>                                                    | <b>1.42</b>                                  |
| <i>S. aureus</i>              | 4 (30.8%)                                                                | 11 (61.1%)                                                           | 0.38                                         |
| CoNS                          | 5 (38.4%)                                                                | 4 (22.2%)                                                            | 1.30                                         |
| <b>Non-SPs</b>                | <b>1 (7.7%)</b>                                                          | <b>1 (5.6%)</b>                                                      | <b>3.24</b>                                  |
| <b>Negative</b>               | <b>3 (23.1%)</b>                                                         | <b>2 (11.1%)</b>                                                     | <b>1.49</b>                                  |

**Supplementary Table 3**

|                               | <b>PR Systemic infection</b><br>N = 14 / total 18 pathogens<br>N (%) | <b>PR Local infection</b><br>N = 71 / total 92 pathogens<br>N (%) | <b>P value</b><br>(Bonferroni<br>correction) |
|-------------------------------|----------------------------------------------------------------------|-------------------------------------------------------------------|----------------------------------------------|
| <b>Staphylococcal species</b> | <b>15 (83.3%)</b>                                                    | <b>56 (60.9%)</b>                                                 | <b>0.27</b>                                  |
| <i>S. aureus</i>              | 11 (61.1%)                                                           | 16 (17.4%)                                                        | 0.0003                                       |
| CoNS                          | 4 (22.2%)                                                            | 40 (43.5%)                                                        | 0.37                                         |
| <b>Non-SPs</b>                | <b>1 (5.6%)</b>                                                      | <b>23 (25.0%)</b>                                                 | <b>0.27</b>                                  |
| <b>Negative</b>               | <b>2 (11.1%)</b>                                                     | <b>13 (14.1%)</b>                                                 | <b>2.93</b>                                  |
